# Supplementary material for: Bexmarilimab Activates Human Tumor-Associated Macrophages to Support Adaptive Immune Responses in Interferon-Poor Immune Microenvironments
Source: PubMed Central journal article supplement — Cancer Immunol Res. 2023 Dec 1;12(1):48–59. doi: 10.1158/2326-6066.CIR-23-0350 (PMC10762336; doi:10.1158/2326-6066.cir-23-0350), 2023-12-01
Supplement: cir-23-0350_figure_s1_supps1.pdf [file cir-23-0350_figure_s1_supps1.pdf]

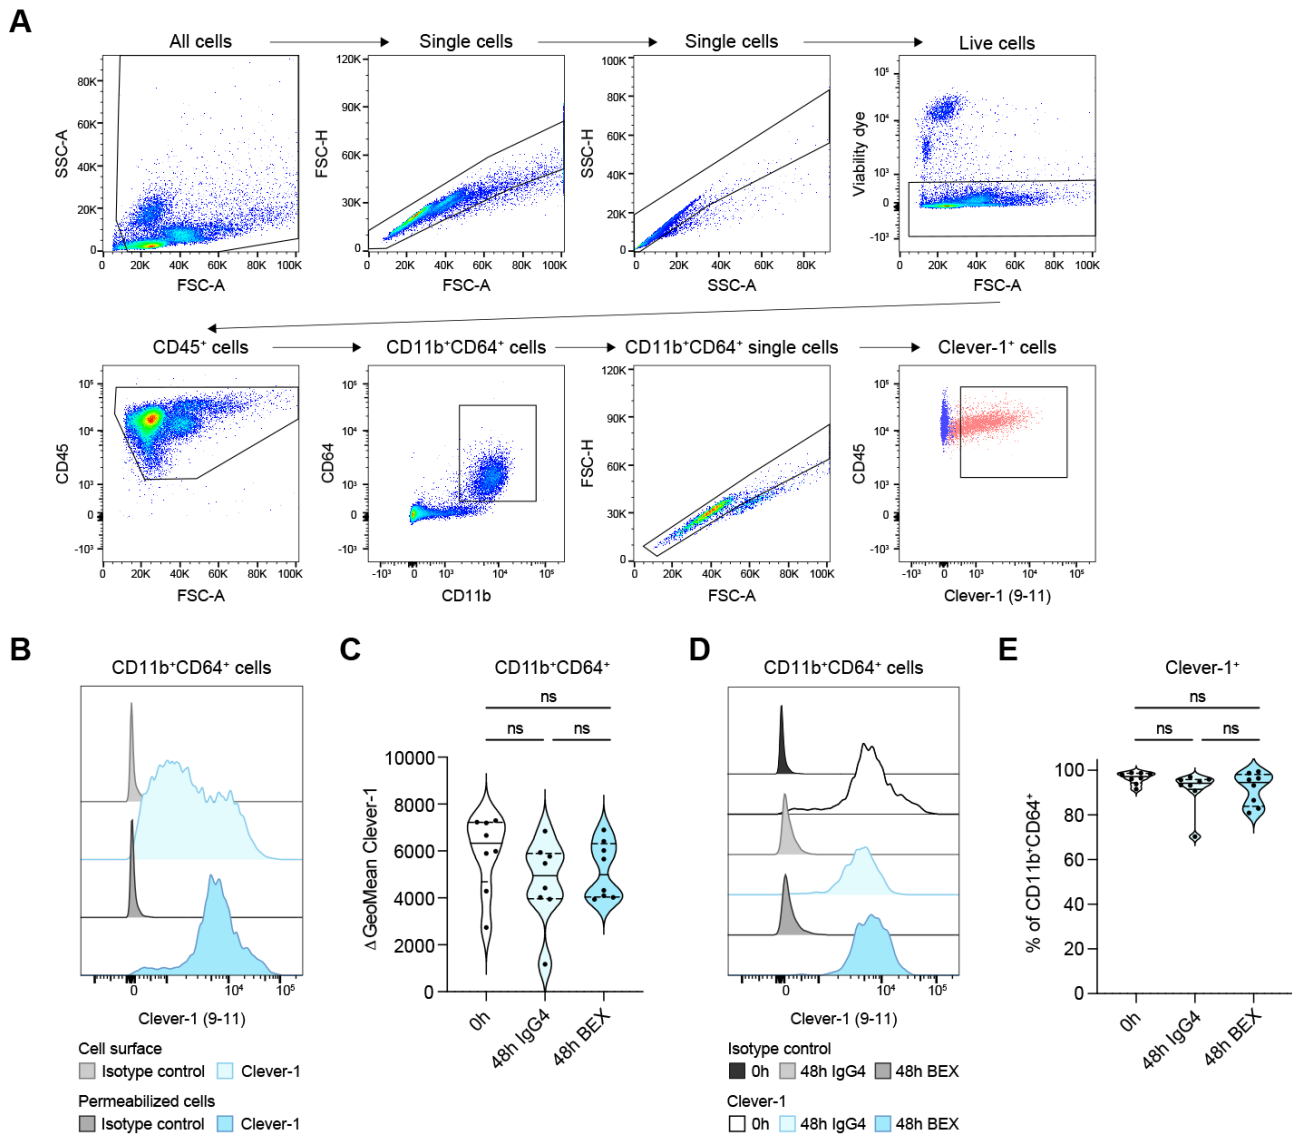

**Supplementary Figure S1. Flow cytometry analysis of ovarian cancer ascites cells, related to Figure 1.** **A**, Gating strategy for analyzing CD11b<sup>+</sup>CD64<sup>+</sup> ovarian cancer ascites cells, related to Figure 1B. **B**, Fluorescence intensity histograms showing Clever-1 expression in CD11b<sup>+</sup>CD64<sup>+</sup> cells of a representative ovarian cancer patient, related to Figure 1C. **C – E**, Clever-1 expression was measured from permeabilized CD11b<sup>+</sup>CD64<sup>+</sup> ascites cells before and after treating ascites cells for 48h with bexmarilimab or IgG4 (n = 8 patients). Violin plots of total Clever-1 expression (**C**), fluorescence intensity histograms of a representative patient (**D**), and percentage of Clever-1<sup>+</sup> CD11b<sup>+</sup>CD64<sup>+</sup> cells (**E**) are shown. Horizontal lines in violin plots mark median and quartiles. RM one-way ANOVA followed by Tukey's test; ns, not significant. BEX, bexmarilimab; IgG4, isotype control for bexmarilimab.
