# Supplementary material for: Bexmarilimab Activates Human Tumor-Associated Macrophages to Support Adaptive Immune Responses in Interferon-Poor Immune Microenvironments
Source: PubMed Central journal article supplement — Cancer Immunol Res. 2023 Dec 1;12(1):48–59. doi: 10.1158/2326-6066.CIR-23-0350 (PMC10762336; doi:10.1158/2326-6066.cir-23-0350), 2023-12-01
Supplement: cir-23-0350_figure_s2_supps2.pdf [file cir-23-0350_figure_s2_supps2.pdf]

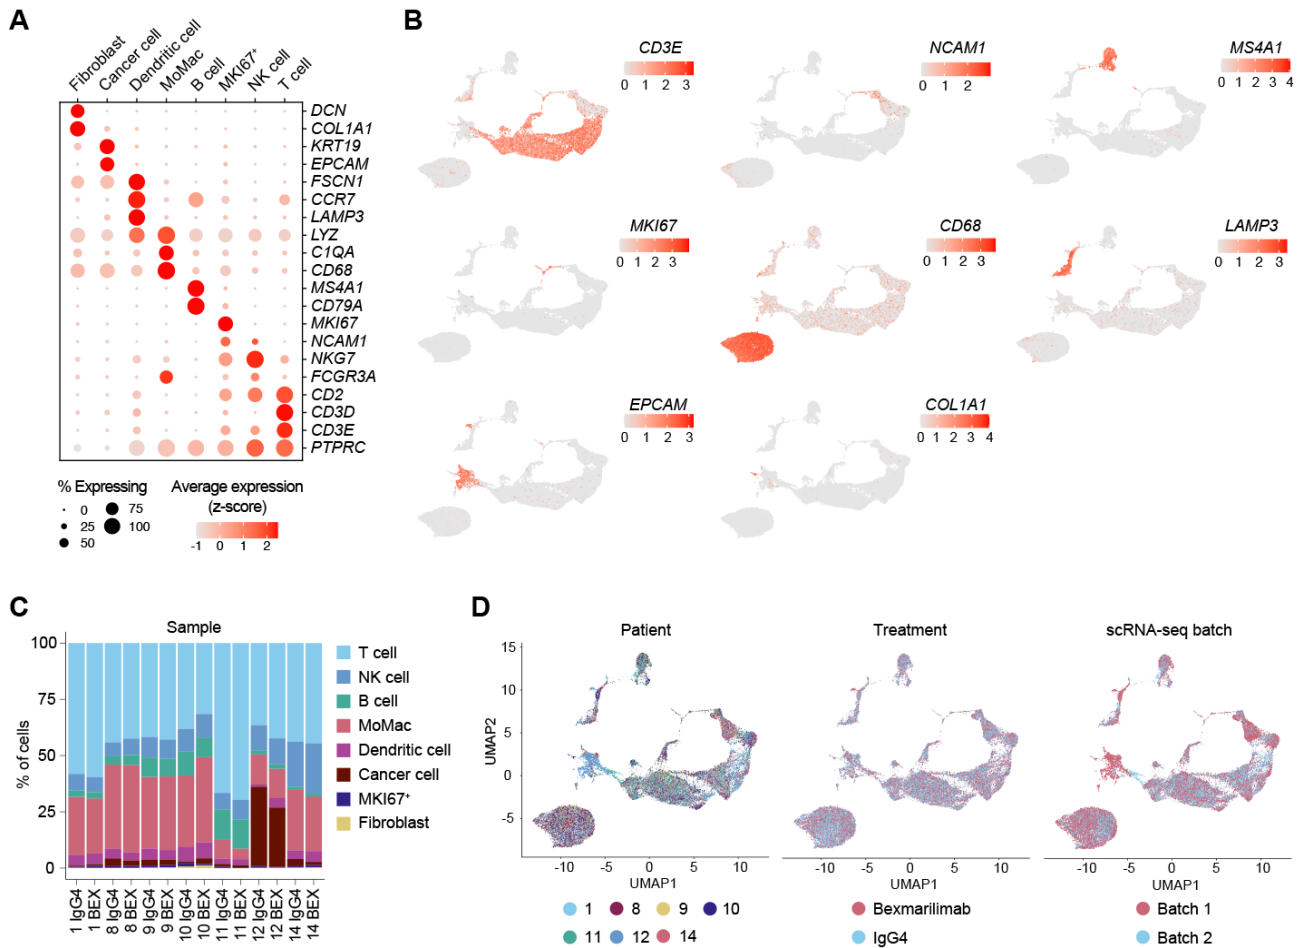

**Supplementary Figure S2. scRNA-seq profiling of ovarian ascites cells after *ex vivo* bexmarilimab treatment, related to Figure 1.**

**A**, Average expression of main cluster marker genes in ovarian ascites cells analyzed by scRNA-seq ( $n = 7$  patients). Dot size represents proportion of cells with marker gene expression. **B**, Expression levels of the indicated main cluster marker genes are shown on UMAP plots. **C**, Proportions of ovarian ascites cells belonging to each main cluster are displayed separately for each sample. **D**, Ovarian ascites cell UMAP plots colored by patient ID, *ex vivo* treatment and scRNA-seq experiment batch. BEX, bexmarilimab; IgG4, isotype control for bexmarilimab.
