# Supplementary material for: Bexmarilimab Activates Human Tumor-Associated Macrophages to Support Adaptive Immune Responses in Interferon-Poor Immune Microenvironments
Source: PubMed Central journal article supplement — Cancer Immunol Res. 2023 Dec 1;12(1):48–59. doi: 10.1158/2326-6066.CIR-23-0350 (PMC10762336; doi:10.1158/2326-6066.cir-23-0350), 2023-12-01
Supplement: cir-23-0350_figure_s3_supps3.pdf [file cir-23-0350_figure_s3_supps3.pdf]

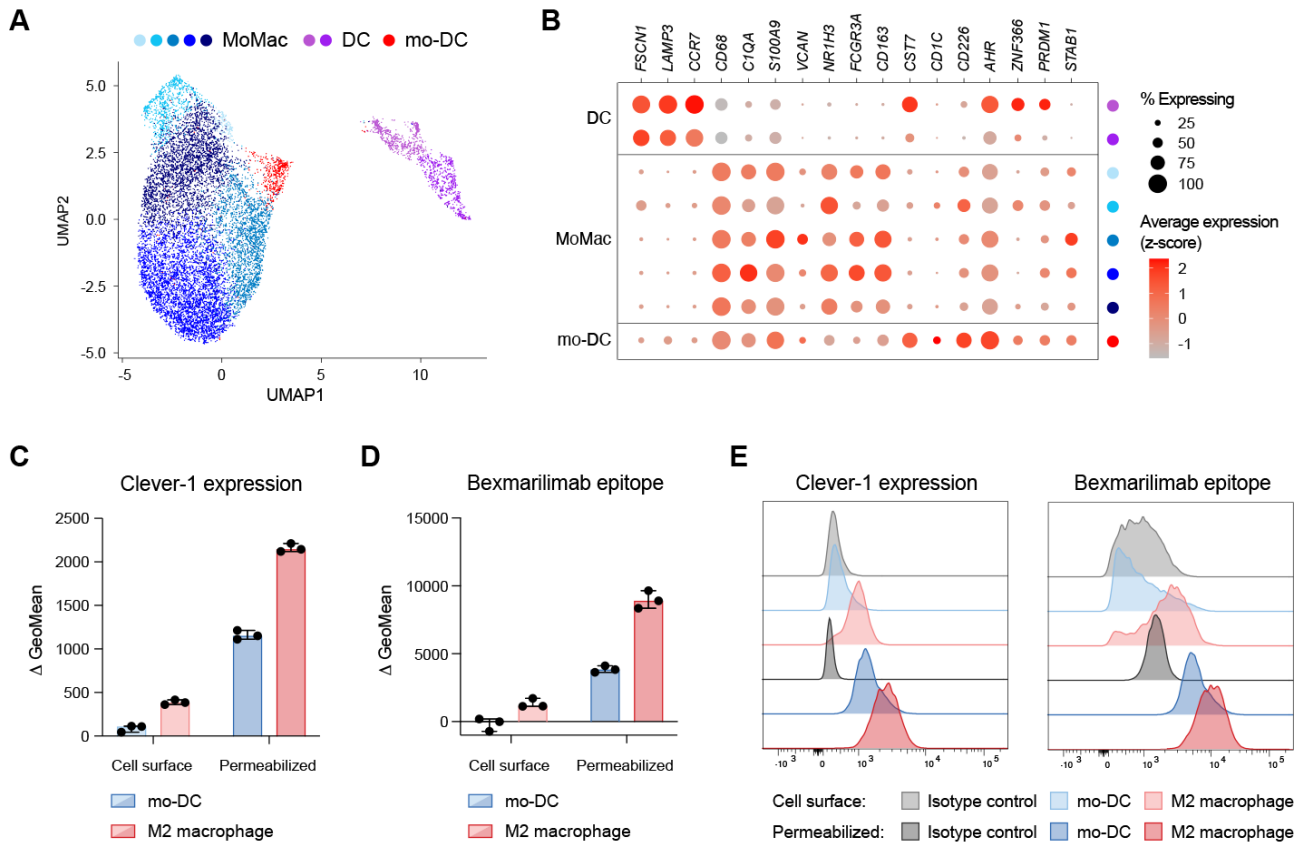

### Supplementary Figure S3. Clever-1 expression in monocyte-derived dendritic cells.

**A**, Subclustering of the two mononuclear phagocyte clusters, MoMacs and dendritic cells, that were identified in the scRNA-seq data from ovarian ascites cells in Fig. 1E ( $n = 7$  patients). The UMAP plot shows monocyte-derived dendritic cell (mo-DC) cluster highlighted in red. **B**, Average expression of DC and MoMac marker genes, genes expressed by mo-DCs (*CST7*, *CD1C*, *CD226*, *AHR*, *ZNF366*, *PRDM1*) (16, 17), genes expressed more strongly in MoMacs than mo-DCs (*NRP1H3*, *FCGR3A*, *CD163*) (17) and Clever-1 (*STAB1*). **C** and **D**, Clever-1 expression (**C**) and bexmarilimab epitope availability (**D**) were analyzed by flow cytometry staining of mo-DCs and M2-polarized macrophages differentiated *in vitro* from  $CD14^+$  monocytes. Each dot represents a healthy donor ( $n = 3$ ), median  $\pm$  range. **E**, Fluorescence intensity histograms of a representative donor from **C** and **D**.
