# Supplementary material for: Bexmarilimab Activates Human Tumor-Associated Macrophages to Support Adaptive Immune Responses in Interferon-Poor Immune Microenvironments
Source: PubMed Central journal article supplement — Cancer Immunol Res. 2023 Dec 1;12(1):48–59. doi: 10.1158/2326-6066.CIR-23-0350 (PMC10762336; doi:10.1158/2326-6066.cir-23-0350), 2023-12-01
Supplement: cir-23-0350_figure_s4_supps4.pdf [file cir-23-0350_figure_s4_supps4.pdf]

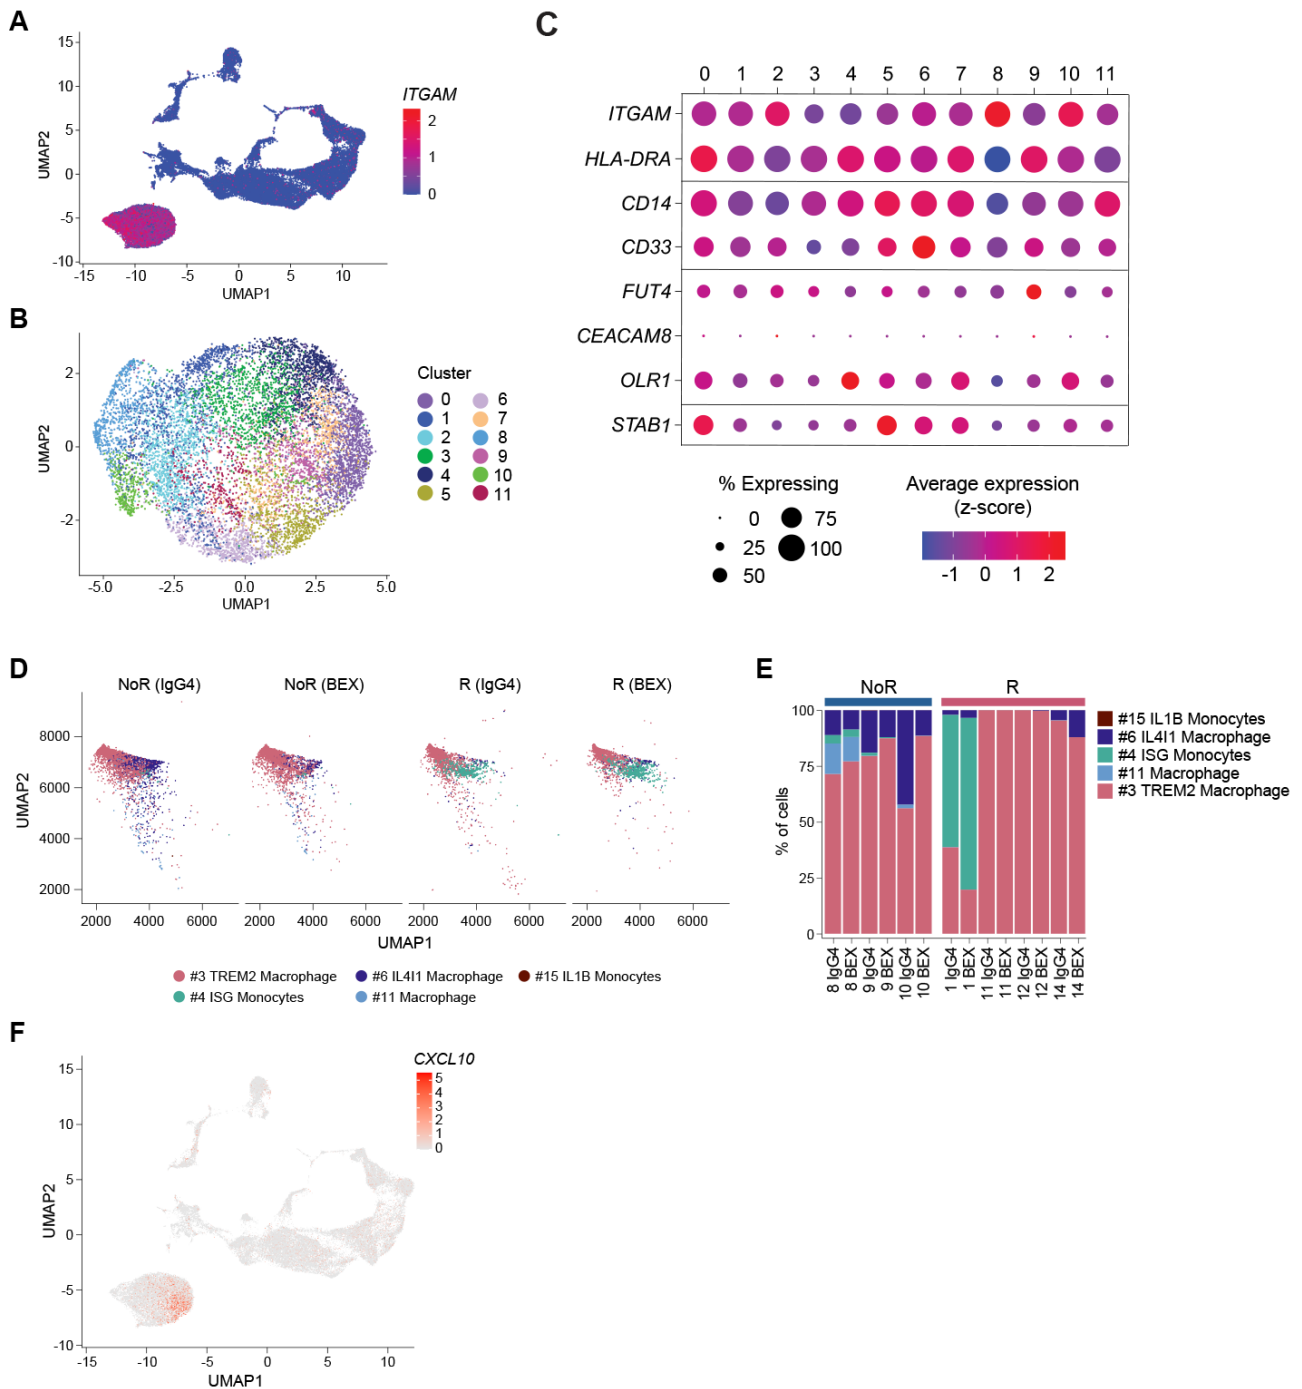

**Supplementary Figure S4. Characterization of the cells in the scRNA-sequenced ovarian ascites MoMac cluster, related to Fig. 1E.**

**A - C**, Myeloid-derived suppressor cell (MDSC) marker gene expression in the scRNA-sequenced ovarian ascites cells ( $n = 7$  patients). As MoMac cluster (Fig. 1E) was the only cluster expressing *ITGAM* (*CD11b*) (A), we clustered these cells (excluding mo-DCs identified in Supplementary Fig. S3) into 12 subclusters (B) to evaluate the expression of known granulocyte-like (PMN-MDSC) and monocyte-like (M-MDSC) MDSC markers (18, 19) (C). We did not identify any clusters corresponding to PMN-MDSC ( $ITGAM^+FUT4^+CEACAM8^+HLA-DRA^{low}CD14^+OLR1^+$ ) or M-MDSC ( $ITGAM^+CD14^+CD33^+HLA-DRA^{low}FUT4^-$ ). **D** and **E**, Mapping of monocytes and macrophages to MoMac-VERSE (Mulder *et al.*) is shown separately for NoR ( $n = 3$ ) and R ( $n = 4$ ) patient samples, related to Fig. 1G and H. MoMac-VERSE UMAP plots of mapped IgG4- and bexmarilimab-treated cells (**D**) and proportions of cells mapped to each MoMac-VERSE cluster (**E**). **F**, UMAP plot of all ovarian ascites cells colored by *CXCL10* expression. BEX, bexmarilimab; IgG4, isotype control for bexmarilimab; NoR, bexmarilimab non-responsive; R, bexmarilimab responsive.
