# Supplementary material for: Bexmarilimab Activates Human Tumor-Associated Macrophages to Support Adaptive Immune Responses in Interferon-Poor Immune Microenvironments
Source: PubMed Central journal article supplement — Cancer Immunol Res. 2023 Dec 1;12(1):48–59. doi: 10.1158/2326-6066.CIR-23-0350 (PMC10762336; doi:10.1158/2326-6066.cir-23-0350), 2023-12-01
Supplement: cir-23-0350_figure_s6_supps6.pdf [file cir-23-0350_figure_s6_supps6.pdf]

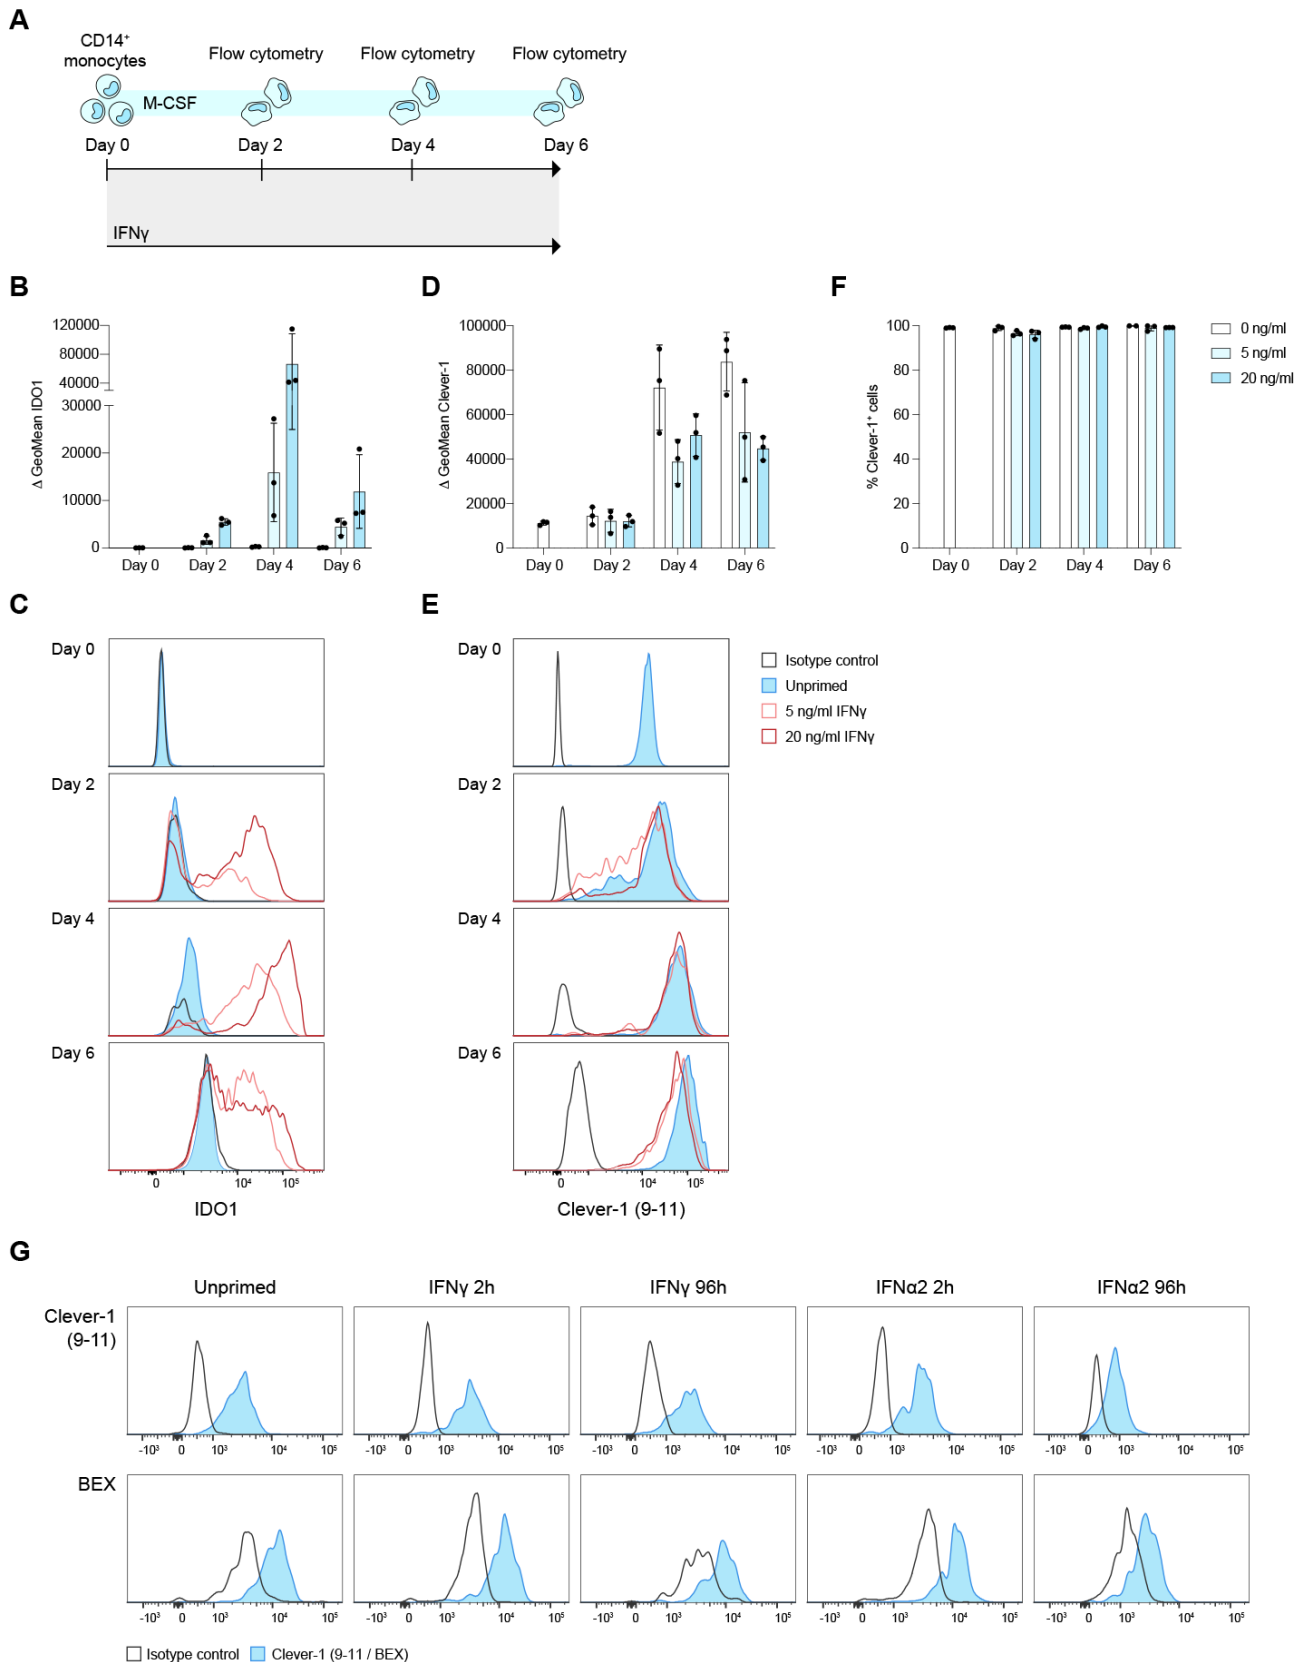

**Supplementary Figure S6. Flow cytometry staining of primary human macrophages after IFN priming, related to Figure 4.**

**A – F**, Flow cytometry staining of human CD14<sup>+</sup> cells at several timepoints during macrophage differentiation and simultaneous IFN $\gamma$  priming. The schematic shows the timeline for primary human macrophage differentiation, IFN $\gamma$  priming and flow cytometry analyses (A). Bar plots show IDO1 expression (B), Clever-1

expression (**D**) and proportion of Clever-1<sup>+</sup> cells (**F**) on fresh monocytes (day 0) and on untreated or primed monocytes/macrophages (day 2, 4 and 6). N = 3 healthy donors, mean  $\pm$  SD. Fluorescence intensity histograms show IDO1 (**C**) and Clever-1 (**E**) expression on CD14<sup>+</sup> cells of a single healthy donor.

**G**, Fluorescence intensity histograms of a representative healthy donor from the data shown in Figures 4E and F. Total Clever-1 expression (top row) and bexmarilimab epitope availability (bottom row) are shown after the indicated IFN priming on day 4 of macrophage differentiation. BEX, bexmarilimab.
