# Supplementary material for: Bexmarilimab Activates Human Tumor-Associated Macrophages to Support Adaptive Immune Responses in Interferon-Poor Immune Microenvironments
Source: PubMed Central journal article supplement — Cancer Immunol Res. 2023 Dec 1;12(1):48–59. doi: 10.1158/2326-6066.CIR-23-0350 (PMC10762336; doi:10.1158/2326-6066.cir-23-0350), 2023-12-01
Supplement: cir-23-0350_figure_s7_supps7.pdf [file cir-23-0350_figure_s7_supps7.pdf]

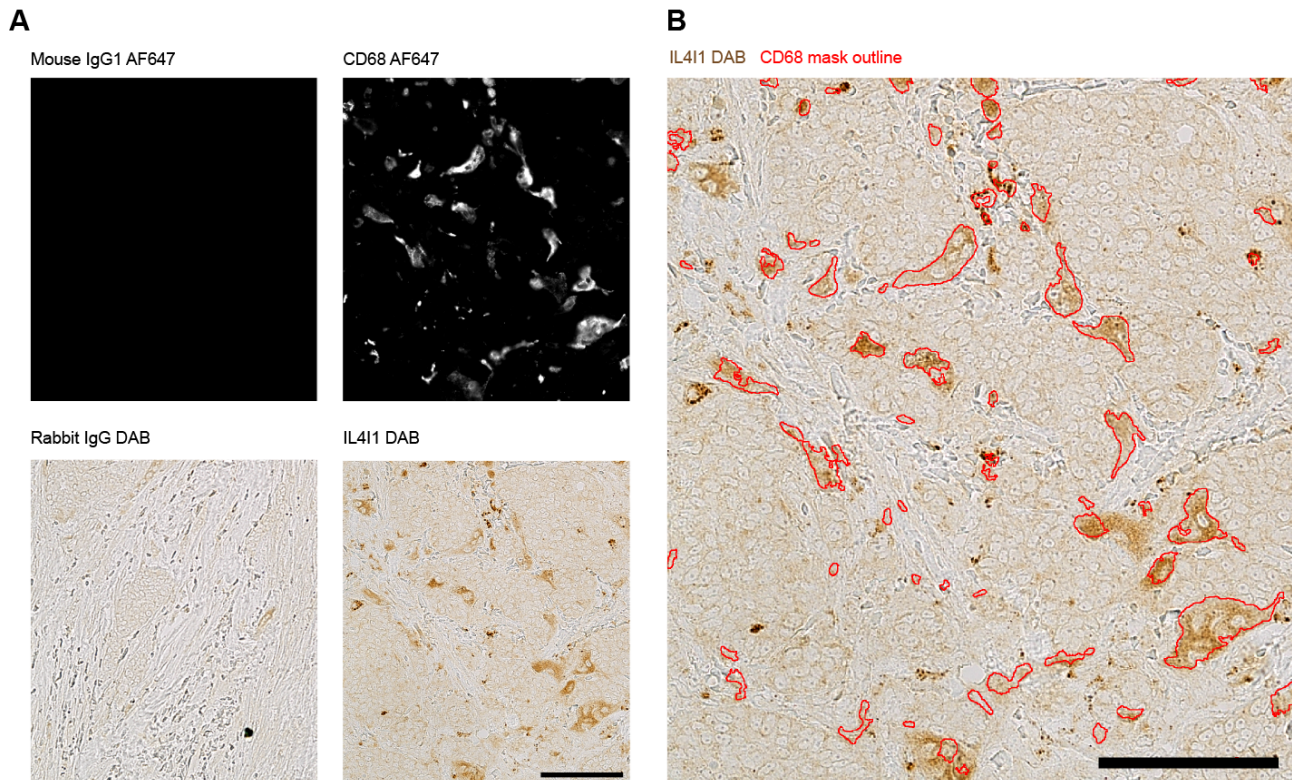

**Supplementary Figure S7. Co-staining of CD68 and IL4I1, related to Figure 4.**

**A**, An FFPE breast cancer section was stained for CD68 and IL4I1, or their isotype controls mouse IgG1  $\kappa$  and rabbit IgG. Scale bar 100  $\mu\text{m}$ . **B**, A representative IL4I1 staining image is shown with red outlines representing CD68<sup>+</sup> macrophage staining. The CD68<sup>+</sup> outlines were obtained by thresholding the corresponding CD68 channel image, creating a binary mask and filling the holes in the binary mask. Scale bar 100  $\mu\text{m}$ .
