# Supplementary material for: Bexmarilimab Activates Human Tumor-Associated Macrophages to Support Adaptive Immune Responses in Interferon-Poor Immune Microenvironments
Source: PubMed Central journal article supplement — Cancer Immunol Res. 2023 Dec 1;12(1):48–59. doi: 10.1158/2326-6066.CIR-23-0350 (PMC10762336; doi:10.1158/2326-6066.cir-23-0350), 2023-12-01
Supplement: cir-23-0350_table_s1_suppst1.pdf [file cir-23-0350_table_s1_suppst1.pdf]

**Supplementary Table S1. Characteristics of *ex vivo* treated ovarian ascites samples used in this study.**

| ID | DECIDER ID | Ovarian cancer histology | Treatment before ascites collection | MX1 ↑ | scRNA-seq batch |
|----|------------|--------------------------|-------------------------------------|-------|-----------------|
| 1  | EOC123     | Mucinous                 | No                                  | R     | 2               |
| 2  | EOC402     | High grade serous        | No                                  | NoR   |                 |
| 3  | EOC340     | High grade serous        | No                                  | R     |                 |
| 4  | EOC1038    | High grade serous        | No                                  | NoR   |                 |
| 5  | EOC268     | High grade serous        | No                                  | NoR   |                 |
| 6  | EOC864     | High grade serous        | No                                  | NoR   | 2*              |
| 7  | EOC357     | High grade serous        | No                                  | NoR   |                 |
| 8  | EOC551     | High grade serous        | No                                  | NoR   | 2               |
| 9  | EOC1002    | High grade serous        | No                                  | NoR   | 1               |
| 10 | EOC126     | High grade serous        | No                                  | NoR   | 1               |
| 11 | EOC737     | High grade serous        | Yes, residue sample**               | R     | 2               |
| 12 | EOC725     | Low grade serous         | No                                  | R     | 1               |
| 13 | EOC984     | High grade serous        | No                                  | NoR   |                 |
| 14 | EOC523     | High grade serous        | No                                  | R     | 1               |

\* excluded from scRNA-seq analyses due to poor scRNA-seq data quality

\*\*6 cycles of carboplatin+paclitaxel two years earlier, one dose of carboplatin+paclitaxel 24h before ascites collection
