# Supplementary material for: Bexmarilimab Activates Human Tumor-Associated Macrophages to Support Adaptive Immune Responses in Interferon-Poor Immune Microenvironments
Source: PubMed Central journal article supplement — Cancer Immunol Res. 2023 Dec 1;12(1):48–59. doi: 10.1158/2326-6066.CIR-23-0350 (PMC10762336; doi:10.1158/2326-6066.cir-23-0350), 2023-12-01
Supplement: cir-23-0350_table_s2_suppst2.pdf [file cir-23-0350_table_s2_suppst2.pdf]

**Supplementary Table S2. MATINS trial pre-treatment biopsies used in this study, related to Figure 4G.**

| <b>Cancer type</b>       | <b>Non-DCR (n)</b> | <b>DCR (n)</b> |
|--------------------------|--------------------|----------------|
| All                      | 23                 | 10             |
| Biliary tract cancer     | 6                  | 2              |
| Cutaneous melanoma       | 6                  | 3              |
| ER+ breast cancer        | 3                  | 1              |
| Gastric adenocarcinoma   | 7                  | 3              |
| Hepatocellular carcinoma | 1                  | 1              |

DCR, patient with observed disease control in the MATINS trial;  
ER+, estrogen receptor-positive.
